# Supplementary material
Source: PubMed Central journal article supplement (PMC4178572)
Supplement: CVI.00222-14_zcd999095054so1.pdf [file CVI.00222-14_zcd999095054so1.pdf]

**TABLE S1.** Tandem mass spectrometry (MS/MS) analysis of 115 and 47 kDa proteins secreted in different clinical isolates of *S. zooepidemicus* associated with canine pneumonia.

| <b>Protein band</b> | <b>Peptides analyzed</b>       | <b>Protein</b>                                                                |
|---------------------|--------------------------------|-------------------------------------------------------------------------------|
| 115 kDa             | KLSQLMTDTQALFTDNCSKL           | SZO_06450<br>(Sz115; putative metallo-<br>protease with mucinase<br>activity) |
|                     | KEGYyliinkQEPNRF               |                                                                               |
|                     | RFYTNHNDALKQNNTPYTYVVRD        |                                                                               |
|                     | RTLRFGLGNAEYATLRV              |                                                                               |
|                     | KQTKPHVYFSGSYEKL               |                                                                               |
|                     | RVKFYDDYAVEAPLTL SKN           |                                                                               |
|                     | KFYDDYAVEAPLTL SKN             |                                                                               |
|                     | KNQATLKLLDHSLELMRSKT           |                                                                               |
|                     | RSKTGSELESEVLTLFTDESTSKL       |                                                                               |
|                     | KQEPNRFYTNHNDALKQ              |                                                                               |
| KQKATDSTEPEKE       |                                |                                                                               |
| RNGQLERIDDSNRTRLRF  |                                |                                                                               |
| 47 kDa              | GNPTLEVEVYTESGAFGRGMVPSGAST    | SZO_11840<br>(Enolase)                                                        |
|                     | VGAPTFKEGLRWGAEV FHALKK        |                                                                               |
|                     | AIEAAGYEAGENGIMIGFDCASSEFYDKER |                                                                               |
